# Supplementary material for: Diagnosing and remediating harmful data shifts for the responsible deployment of clinical AI models
Source: bioRxiv or medRxiv preprint supplement (doi:10.1101/2023.03.26.23286718), 2023-05-04
Supplement: Supplementary file [file media-1.pdf]

# Supplementary Materials

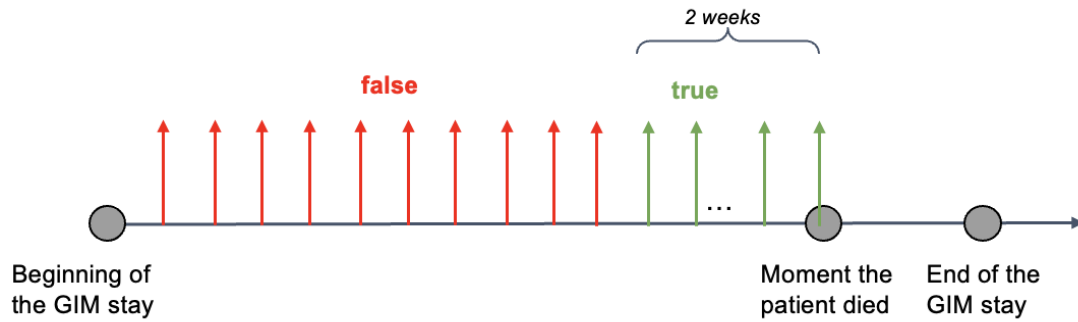

**Supplementary Figure 1. Mortality decompensation prediction in general internal medicine (GIM).** Model predicts whether patients' health deteriorates and results in hospital mortality within the next 2 weeks, every 24 hours of a GIM stay.

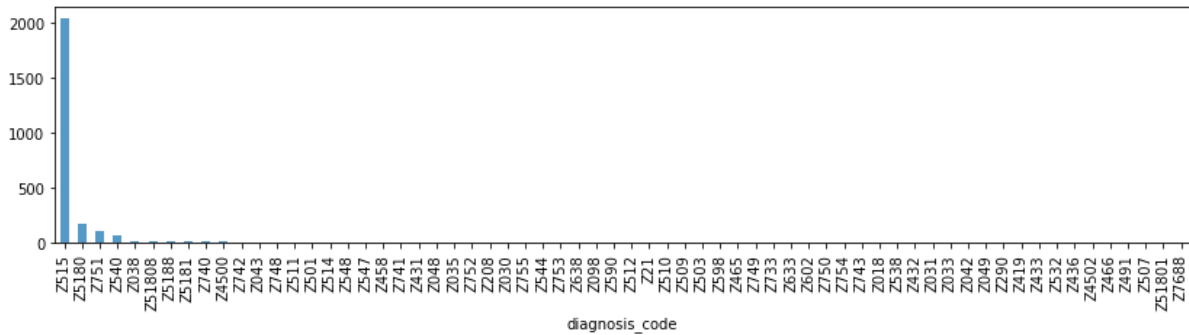

**Supplementary Figure 2. Distribution of diagnosis codes across factors influencing health status and contact with health services (Z00-Z99).**

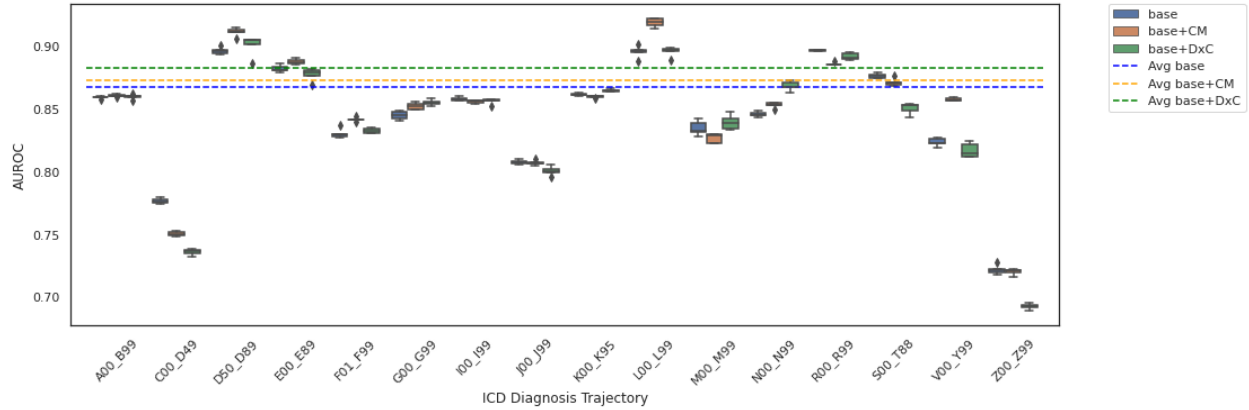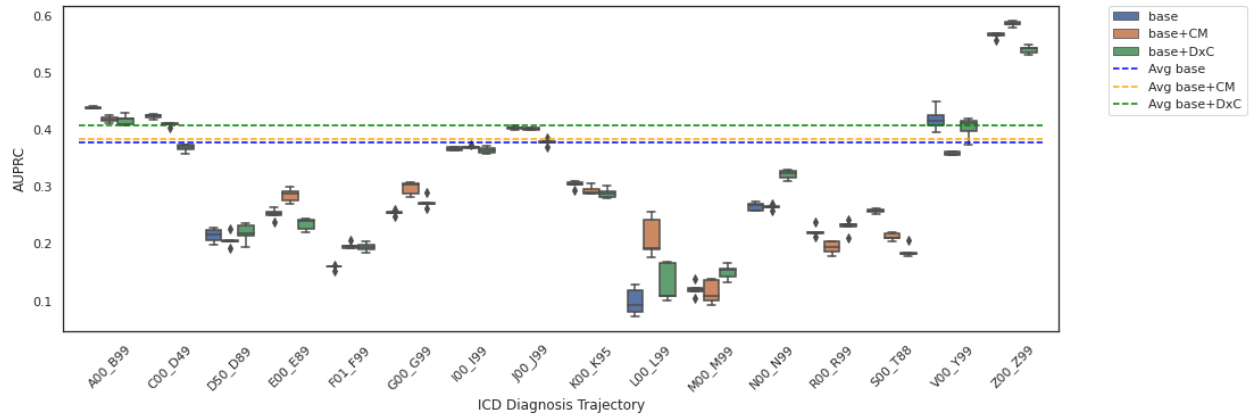

**Supplementary Figure 3.** Performance of model using no prior information (base), comorbidities (base+CM) and ICD-10 diagnosis codes (base+DxC) across diagnosis codes measured using AUROC and AUPRC. The dotted line represents the average performance for each respective model, across all groups of ICD-10 diagnosis codes.

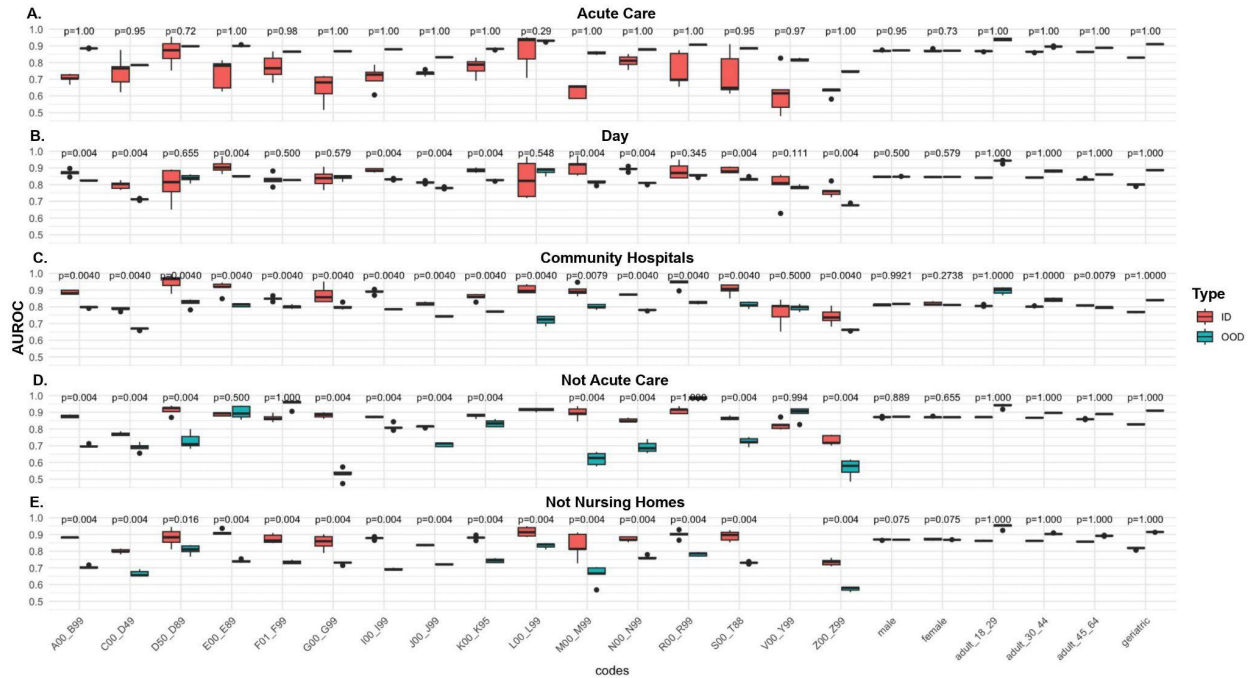

**Supplementary Figure 4.** AUROC for in-distribution (ID) and out-of-distribution (OOD) data, across ICD-10 diagnosis codes, age and sex, for scenarios where harmful data shifts were detected: **(A)** model trained on patients admitted from acute care institutions **(B)** model trained on patients admitted during the day **(C)** model trained on patients admitted from community hospitals **(D)** model trained on patients admitted not from acute care institutions **(E)** model trained on patients not admitted from nursing homes. P-values were calculated using a one-sided Mann-Whitney U test.

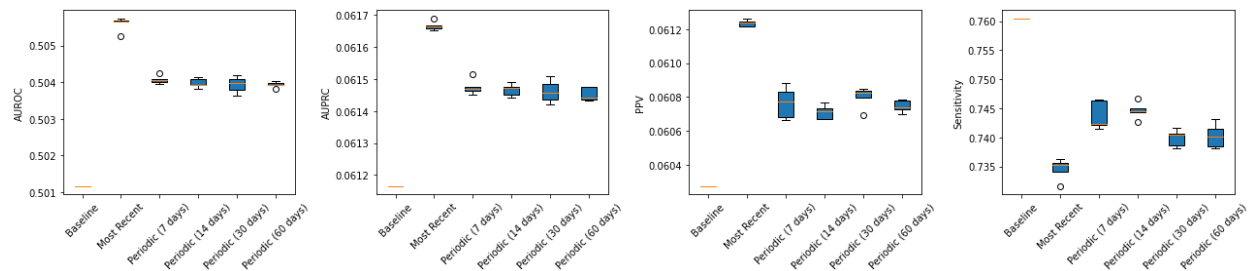

**Supplementary Figure 5.** Comparison of AUROC, AUPRC, PPV, and sensitivity when updating periodically every  $n = 7, 14, 30,$  and  $60$  days.

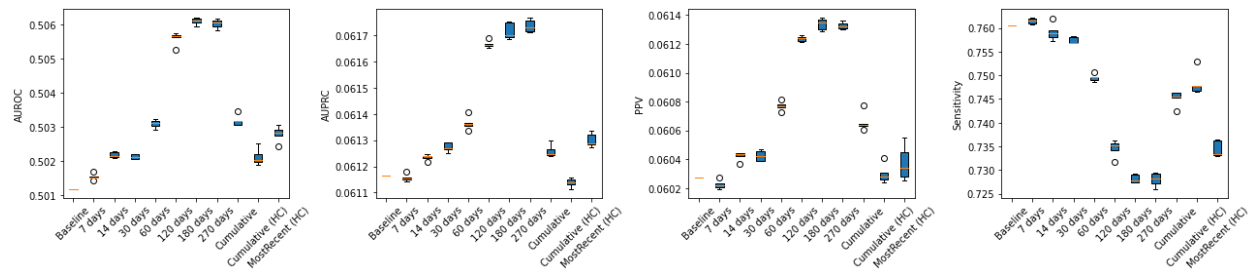

**Supplementary Figure 6.** Comparison of AUROC, AUPRC, PPV, and sensitivity across strategies retraining using a dynamic window of the most recent encounters ( $n = 7, 14, 30, 60, 120, 180, 270$  days) and cumulatively.

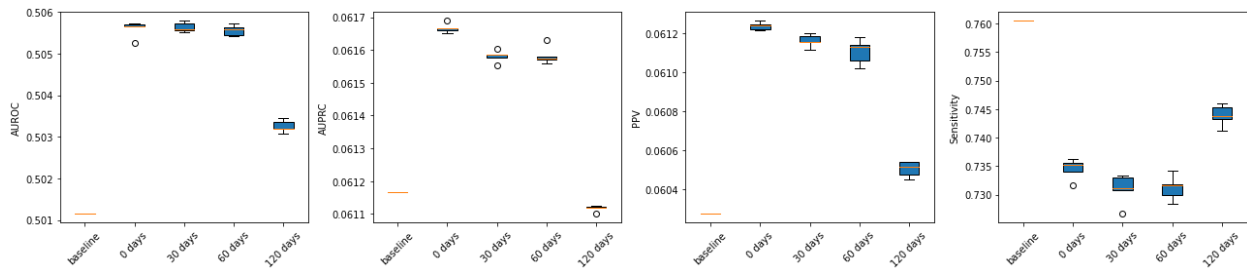

**Supplementary Figure 7.** Comparison of AUROC, AUPRC, PPV, and sensitivity across increasing lookback windows ( $n = 0, 30, 60, 120$  days).

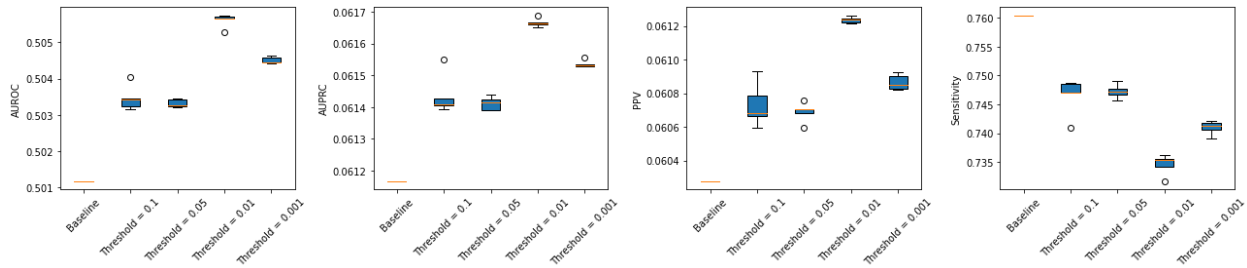

**Supplementary Figure 8.** Comparison of AUROC, AUPRC, PPV, and sensitivity across varying drift p-value thresholds for retraining ( $p = 0.1, 0.05, 0.01, 0.001$ ).

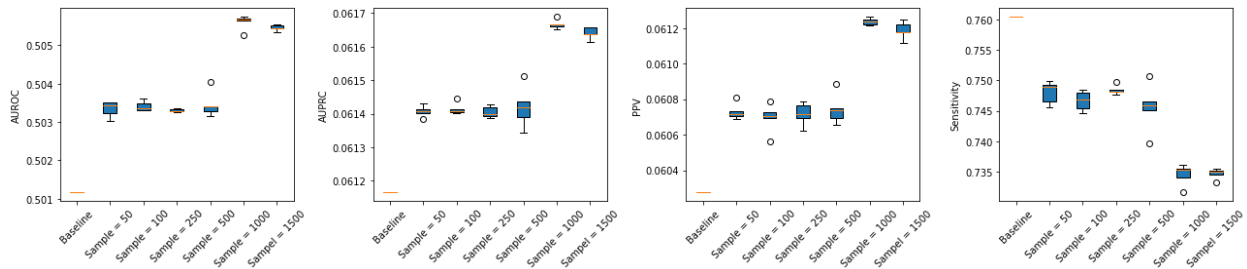

**Supplementary Figure 9.** Comparison of AUROC, AUPRC, PPV, and sensitivity across varying sample sizes for drift tests ( $n = 50, 100, 250, 500, 1000, 1500$ ).

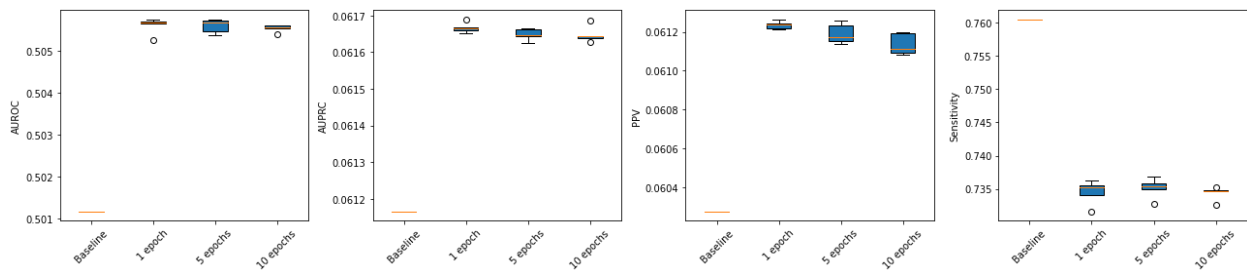

**Supplementary Figure 10.** Comparison of AUROC, AUPRC, PPV, and sensitivity across varying epochs for retraining ( $n = 1, 5, 10$ ).

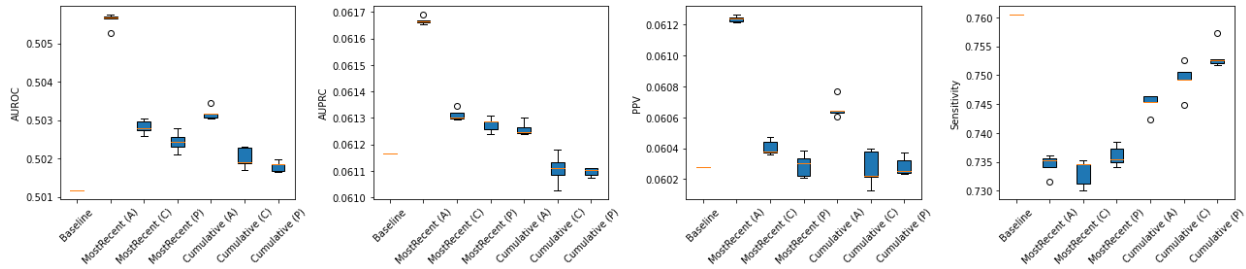

**Supplementary Figure 11.** Comparison of AUROC, AUPRC, PPV, and sensitivity when updating using the most recent and cumulative retraining strategy with all encounters (A), correctly predicted encounters (C) or positively predicted encounters (P).

| Feature Type                                   | # of Features | Features                                                                                                                                                                                                                                                                                                                                                                                                                                                                                                                                                                                                                                                                           |
|------------------------------------------------|---------------|------------------------------------------------------------------------------------------------------------------------------------------------------------------------------------------------------------------------------------------------------------------------------------------------------------------------------------------------------------------------------------------------------------------------------------------------------------------------------------------------------------------------------------------------------------------------------------------------------------------------------------------------------------------------------------|
| Administrative                                 | 16            | sex, age, prev_encounter_count, triage_level_emergent, triage_level_no_info, triage_level_non-urgent, triage_level_resuscitation, triage_level_semi-urgent, triage_level_urgent, readmission_new_to_acute, readmission_nota, readmission_planned_from_acute, readmission_unplanned_7_day_acute, readmission_unplanned_7_day_day_surg, readmission_unplanned_8_to_28_day_acute, from_nursing_home_mapped, from_acute_care_institution_mapped                                                                                                                                                                                                                                        |
| Interventions                                  | 6             | unmapped_intervention, inv_mech_vent_mapped, endoscopy_mapped, dialysis_mapped, surgery_mapped, interventional                                                                                                                                                                                                                                                                                                                                                                                                                                                                                                                                                                     |
| Labs                                           | 55            | albumin, alp, alt, aptt, arterial_paco2, arterial_pao2, arterial_ph, ast, bicarbonate, bilirubin, blood_urea_nitrogen, calcium, calcium_ionized, creatinine, crp, d-dimer, esr, ferritin, fibrinogen, glucose_fasting, glucose_point_of_care, glucose_random, hba1c, hematocrit, hemoglobin, high_sensitivity_troponin, influenza, inr, ketone, lactate_arterial, lactate_venous, ldh, lipase, lymphocyte, mean_cell_volume, neutrophils, other, platelet_count, potassium, pt, serum_alcohol, serum_osmolality, sodium, troponin, tsh, urinalysis, urine_osmolality, urine_sodium, urine_specific_gravity, venous_pco2, venous_ph, vitamin_b12, vitamin_d, white_blood_cell_count |
| Imaging Reports                                | 5             | ct, mri, x-ray, echo, ultrasound                                                                                                                                                                                                                                                                                                                                                                                                                                                                                                                                                                                                                                                   |
| Blood Transfusions                             | 2             | rbc, non-rbc                                                                                                                                                                                                                                                                                                                                                                                                                                                                                                                                                                                                                                                                       |
| Comorbidities<br><i>(Only used in Base+CM)</i> | 18            | Kidney disease: N18, N19<br>Ischemic heart disease: I20-I52<br>Cerebrovascular disease: I60-69<br>Hypertension: I10-I15<br>Diabetes: E10-E13<br>Hyperlipidemia: E78<br>Hypertension: I10<br>Congestive heart failure: I50<br>Cancer: C00-D49<br>Dyspnea: R06<br>COPD: J44<br>Asthma: J45<br>Pulmonary embolism: I26<br>Connective tissue disease: I30-I36<br>Inflammatory bowel disease: K50, K51,<br>Osteoarthritis: M15-M19                                                                                                                                                                                                                                                      |

|                                                       |    |                                                                                                                                                                                                                                                                                                                                                                                                                                                                                                                                                                                                                                                                                                                                                                                                                                                                                                                                                                                                                                                                                                                                                                                                                                                                                                                                     |
|-------------------------------------------------------|----|-------------------------------------------------------------------------------------------------------------------------------------------------------------------------------------------------------------------------------------------------------------------------------------------------------------------------------------------------------------------------------------------------------------------------------------------------------------------------------------------------------------------------------------------------------------------------------------------------------------------------------------------------------------------------------------------------------------------------------------------------------------------------------------------------------------------------------------------------------------------------------------------------------------------------------------------------------------------------------------------------------------------------------------------------------------------------------------------------------------------------------------------------------------------------------------------------------------------------------------------------------------------------------------------------------------------------------------|
|                                                       |    | Rheumatoid arthritis: M05-M14<br>HIV: B20-B24                                                                                                                                                                                                                                                                                                                                                                                                                                                                                                                                                                                                                                                                                                                                                                                                                                                                                                                                                                                                                                                                                                                                                                                                                                                                                       |
| ICD-10 Diagnosis Codes<br><br>(Only used in Base+DxC) | 22 | Certain infectious and parasitic diseases: A00-B99<br>Neoplasms: C00-D49<br>Diseases of the blood and blood-forming organs and certain disorders involving the immune mechanism: D50-D89<br>Endocrine, nutritional and metabolic diseases: E00-E89<br>Mental, Behavioral and Neurodevelopmental disorders: F01-F99<br>Diseases of the nervous system: G00-G99<br>Diseases of the eye and adnexa: H00-H59<br>Diseases of the ear and mastoid process: H60-H95<br>Diseases of the circulatory system: I00-I99<br>Diseases of the respiratory system: J00-J99<br>Diseases of the digestive system: K00-K95<br>Diseases of the skin and subcutaneous tissue: L00-L99<br>Diseases of the musculoskeletal system and connective tissue: M00-M99<br>Diseases of the genitourinary system: N00-N99<br>Pregnancy, childbirth and the puerperium: O00-O99<br>Certain conditions originating in the perinatal period: P00-P96<br>Congenital malformations, deformations and chromosomal abnormalities: Q00-Q99<br>Symptoms, signs and abnormal clinical and laboratory findings, not elsewhere classified: R00-R99<br>Injury, poisoning and certain other consequences of external causes: S00-T88<br>External causes of morbidity: V00-Y99<br>COVID19: U07-U08<br>Factors influencing health status and contact with health services: Z00-Z99 |

**Supplementary Table 1.** EHR features used for mortality decompensation prediction.

| Model                          | AUROC          | AUPRC          | Sensitivity    | PPV            |
|--------------------------------|----------------|----------------|----------------|----------------|
| Recurrent neural network (RNN) | 0.835 ± 0.0005 | 0.328 ± 0.0026 | 0.887 ± 0.0030 | 0.162 ± 0.0016 |
| Gated recurrent unit (GRU)     | 0.838 ± 0.0013 | 0.344 ± 0.0030 | 0.865 ± 0.0067 | 0.177 ± 0.0008 |
| Long short-term memory (LSTM)  | 0.846 ± 0.0009 | 0.349 ± 0.0022 | 0.887 ± 0.0045 | 0.173 ± 0.0013 |

**Supplementary Table 2.** AUROC, AUPRC, sensitivity, and PPV of the test set, for time series models including RNN, GRU and LSTM models.

| Mortality | False |       |       |       |       |       |       | True  |       |       |       |       |       |       |
|-----------|-------|-------|-------|-------|-------|-------|-------|-------|-------|-------|-------|-------|-------|-------|
|           | 1(A)  | 2(A)  | 3(A)  | 4(C)  | 5(C)  | 6(A)  | 7(A)  | 1(A)  | 2(A)  | 3(A)  | 4(C)  | 5(C)  | 6(A)  | 7(A)  |
| A00_B99   | 0.086 | 0.065 | 0.065 | 0.078 | 0.082 | 0.083 | 0.072 | 0.152 | 0.115 | 0.099 | 0.135 | 0.112 | 0.119 | 0.129 |
| C00_D49   | 0.065 | 0.059 | 0.039 | 0.036 | 0.029 | 0.066 | 0.035 | 0.177 | 0.125 | 0.111 | 0.080 | 0.073 | 0.190 | 0.102 |
| D50_D89   | 0.032 | 0.018 | 0.019 | 0.015 | 0.016 | 0.048 | 0.018 | 0.011 | 0.004 | 0.003 | 0.004 | 0.003 | 0.015 | 0.007 |
| E00_E89   | 0.063 | 0.050 | 0.063 | 0.058 | 0.051 | 0.055 | 0.066 | 0.017 | 0.025 | 0.019 | 0.028 | 0.018 | 0.020 | 0.023 |
| F01_F99   | 0.047 | 0.047 | 0.053 | 0.052 | 0.072 | 0.026 | 0.057 | 0.020 | 0.032 | 0.031 | 0.030 | 0.048 | 0.013 | 0.023 |
| G00_G99   | 0.038 | 0.051 | 0.038 | 0.065 | 0.039 | 0.026 | 0.028 | 0.011 | 0.031 | 0.028 | 0.028 | 0.031 | 0.008 | 0.012 |
| H00_H59   | 0.004 | 0.006 | 0.003 | 0.005 | 0.001 | 0.001 | 0.002 | NA    | NA    | NA    | NA    | NA    | NA    | NA    |
| H60_H95   | 0.006 | 0.006 | 0.004 | 0.012 | 0.009 | 0.006 | 0.006 | NA    | NA    | NA    | NA    | NA    | NA    | NA    |
| I00_I99   | 0.101 | 0.147 | 0.143 | 0.138 | 0.219 | 0.138 | 0.131 | 0.103 | 0.211 | 0.165 | 0.175 | 0.249 | 0.119 | 0.158 |
| J00_J99   | 0.127 | 0.132 | 0.144 | 0.130 | 0.106 | 0.137 | 0.163 | 0.217 | 0.238 | 0.175 | 0.256 | 0.229 | 0.197 | 0.258 |
| K00_K95   | 0.108 | 0.103 | 0.118 | 0.059 | 0.046 | 0.106 | 0.094 | 0.051 | 0.081 | 0.079 | 0.048 | 0.039 | 0.085 | 0.064 |

|         |       |       |       |       |       |       |       |       |       |       |       |       |       |       |
|---------|-------|-------|-------|-------|-------|-------|-------|-------|-------|-------|-------|-------|-------|-------|
| L00_L99 | 0.028 | 0.026 | 0.029 | 0.024 | 0.021 | 0.022 | 0.022 | 0.003 | 0.005 | 0.003 | 0.004 | 0.006 | 0.004 | 0.001 |
| M00_M99 | 0.044 | 0.041 | 0.049 | 0.053 | 0.036 | 0.036 | 0.043 | 0.009 | 0.008 | 0.011 | 0.011 | 0.007 | 0.006 | 0.006 |
| N00_N99 | 0.059 | 0.066 | 0.062 | 0.076 | 0.085 | 0.057 | 0.063 | 0.025 | 0.042 | 0.030 | 0.054 | 0.057 | 0.035 | 0.039 |
| O00_O99 | 0.002 | 0.001 | 0.001 | 0.003 | 0.001 | 0.000 | 0.001 | NA    | NA    | NA    | NA    | NA    | NA    | NA    |
| Q00_Q99 | NA    | NA    | NA    | NA    | NA    | NA    | NA    | NA    | NA    | NA    | NA    | NA    | NA    | NA    |
| R00_R99 | 0.094 | 0.134 | 0.120 | 0.113 | 0.116 | 0.142 | 0.129 | 0.019 | 0.030 | 0.028 | 0.011 | 0.030 | 0.036 | 0.035 |
| S00_T88 | 0.074 | 0.038 | 0.041 | 0.072 | 0.061 | 0.036 | 0.059 | 0.027 | 0.023 | 0.016 | 0.033 | 0.031 | 0.016 | 0.018 |
| V00_Y99 | 0.002 | 0.002 | 0.004 | 0.005 | 0.003 | 0.003 | 0.004 | 0.004 | 0.003 | 0.004 | 0.013 | 0.011 | 0.005 | 0.009 |
| Z00_Z99 | 0.020 | 0.008 | 0.004 | 0.006 | 0.005 | 0.011 | 0.008 | 0.156 | 0.027 | 0.197 | 0.089 | 0.054 | 0.131 | 0.117 |

**Supplementary Table 3.** Proportion of patient encounters across ICD-10 diagnosis codes, hospital and mortality status. Values for groupings of diagnosis codes with < 5 patient encounters have been omitted due to privacy preserving practices required by GEMINI. A = academic hospital, C = community hospital.

| Mortality                               | False    |       |       |       |       |       |       | True  |       |       |       |       |       |       |
|-----------------------------------------|----------|-------|-------|-------|-------|-------|-------|-------|-------|-------|-------|-------|-------|-------|
|                                         | Hospital | 1(A)  | 2(A)  | 3(A)  | 4(C)  | 5(C)  | 6(A)  | 7(A)  | 1(A)  | 2(A)  | 3(A)  | 4(C)  | 5(C)  | 6(A)  |
| # of Encounters                         | 16620    | 27394 | 16100 | 15096 | 22691 | 16238 | 14072 | 2405  | 2306  | 1589  | 1415  | 3524  | 1791  | 1808  |
| LOS (days)                              | 8.47     | 8.44  | 7.90  | 8.73  | 10.05 | 7.55  | 9.03  | 14.59 | 17.19 | 17.62 | 19.02 | 17.72 | 12.80 | 14.12 |
| # of Previous Encounters from 2010-2020 | 0.72     | 0.60  | 1.19  | 0.68  | 0.60  | 0.82  | 0.90  | 1.28  | 1.12  | 1.53  | 1.36  | 1.16  | 1.31  | 1.63  |
| From Acute Care (%)                     | 2        | 0     | 1     | 1     | 0     | 1     | 1     | 7     | 1     | 1     | 3     | 0     | 1     | 0     |
| From Nursing Home (%)                   | 6        | 8     | 4     | 11    | 12    | 4     | 10    | 13    | 18    | 14    | 31    | 30    | 8     | 22    |
| Palliative Care (n)                     | 260      | 151   | 50    | 52    | 39    | 160   | 80    | 373   | 56    | 313   | 123   | 191   | 235   | 210   |

**Supplementary Table 4.** Patient admission and stay characteristics by hospital and mortality status. Number of patient encounters, average length of stay (LOS), average number of previous encounters from 2010-2020, percentage of patient encounters from acute care institutions, percentage of patient encounters from nursing homes, and number of patients receiving palliative care, across hospitals and mortality status. A = academic hospital, C = community hospital.

| Source              | Target              | Metric | Base                | Base + Comorbidities | Base + ICD-10 Diagnosis Codes |
|---------------------|---------------------|--------|---------------------|----------------------|-------------------------------|
|                     |                     |        | Target – Source (%) | Target – Source (%)  | Target – Source (%)           |
| Community Hospitals | Academic Hospitals  | AUROC  | -4.0                | -2.6                 | -0.9                          |
|                     |                     | AUPRC  | -6.8                | -5.0                 | -3.2                          |
| Academic Hospitals  | Community Hospitals | AUROC  | -1.1                | -1.8                 | 0.0                           |
|                     |                     | AUPRC  | -3.2                | -4.8                 | 0.0                           |
| Excl. Winter        | Seasonal Winter     | AUROC  | +0.7                | -0.3                 | -1.2                          |
|                     |                     | AUPRC  | -0.6                | +0.9                 | -0.1                          |
| Excl.               | Seasonal            | AUROC  | +0.8                | +1.2                 | +0.3                          |

|                        |                        |       |      |      |      |
|------------------------|------------------------|-------|------|------|------|
| <b>Summer</b>          | <b>Summer</b>          | AUPRC | +1.0 | +0.9 | -0.3 |
| <b>Night Admission</b> | <b>Day Admission</b>   | AUROC | +1.6 | -0.2 | +0.2 |
|                        |                        | AUPRC | +3.0 | +0.9 | +2.1 |
| <b>Day Admission</b>   | <b>Night Admission</b> | AUROC | -1.9 | -0.7 | -0.8 |
|                        |                        | AUPRC | -5.6 | -3.2 | -3.7 |

**Supplementary Table 5.** Performance of models on in-distribution (source) and out-of-distribution (target) data without prior information (base), with comorbidities (base+CM) and with diagnosis codes (base+DxC) as features.
